# Supplementary material for: An ion imprinting technology-assisted rotational microfluidic hybrid chip for the fluorescence detection of hexavalent chromium ions
Source: Royal Society of Chemistry journal article supplement (doi:10.1039/d2an00896c), 2022-01-01
Supplement: d2an00896c1.pdf [file d2an00896c1.pdf]

## Supporting information

# Ion imprinting technology-assisted rotational microfluidic hybrid chip for fluorescence detection of hexavalent chromium ions

Liyan Wang<sup>a,b,c</sup>, Bowei Li<sup>a,d</sup> \*, Jinhua Li<sup>a,d</sup>, Ji Qi<sup>a,d</sup>, Zhiyang Zhang<sup>a,d</sup>, Lingxin Chen<sup>a,d,e\*</sup>

<sup>a</sup> CAS Key Laboratory of Coastal Environmental Processes and Ecological Remediation, Research Center for Coastal Environmental Engineering Technology of Shandong Province, Yantai Institute of Coastal Zone Research, Chinese Academy of Sciences, Yantai 264003, China

<sup>b</sup> Department of Polymer Chemistry, Yantai Engineering & Technology College, Yantai 264006, China

<sup>c</sup> University of Chinese Academy of Sciences, Beijing 100049, China

<sup>d</sup> Center for Ocean Mega-Science, Chinese Academy of Sciences, Qingdao, 266071, China

<sup>e</sup> School of Pharmacy, Binzhou Medical University, Yantai 264003, China

\*Corresponding author.

Lingxin Chen, E-mail: lxchen@yic.ac.cn; Bowei Li, E-mail: bwli@yic.ac.cn

## Table of contents

**Fig. S1.** Photographs of (A) the rotational microfluidic hybrid chip printed on Whatman chromatography No. 1 filter paper of A4 size, (B) three layers without/with designed holes in them.

**Fig. S2.** Photograph of the rotational microfluidic hybrid chip placed on the shelf of F-4700 spectrophotometer.

**Fig. S3.** SEM images of the NIP cloth-based fluorescence sensing component.

**Fig. S4.** Fluorescence quenching of TGA-capped CdTe QDs with different reflux time.

**Fig. S5.** Effects of the amount of CdTe quantum dots on fluorescence intensity and quenching of cloth-based sensing components.

**Fig. S6.** FT-IR spectra of (a) bare cloth, (b) cloth grafted with CdTe quantum dots and (c) IIP cloth-based fluorescence sensing component.

**Fig. S7.** Photographs of cloth (up) and paper (down) after vigorous magnetic stirred of (a) 0 min, (b) 10 min and (c) 20 min.

**Table.S1.** The performance of Cr-IIP cloth-based fluorescence sensing components under different concentration of template ions and addition amount of functional monomer and crosslinker.

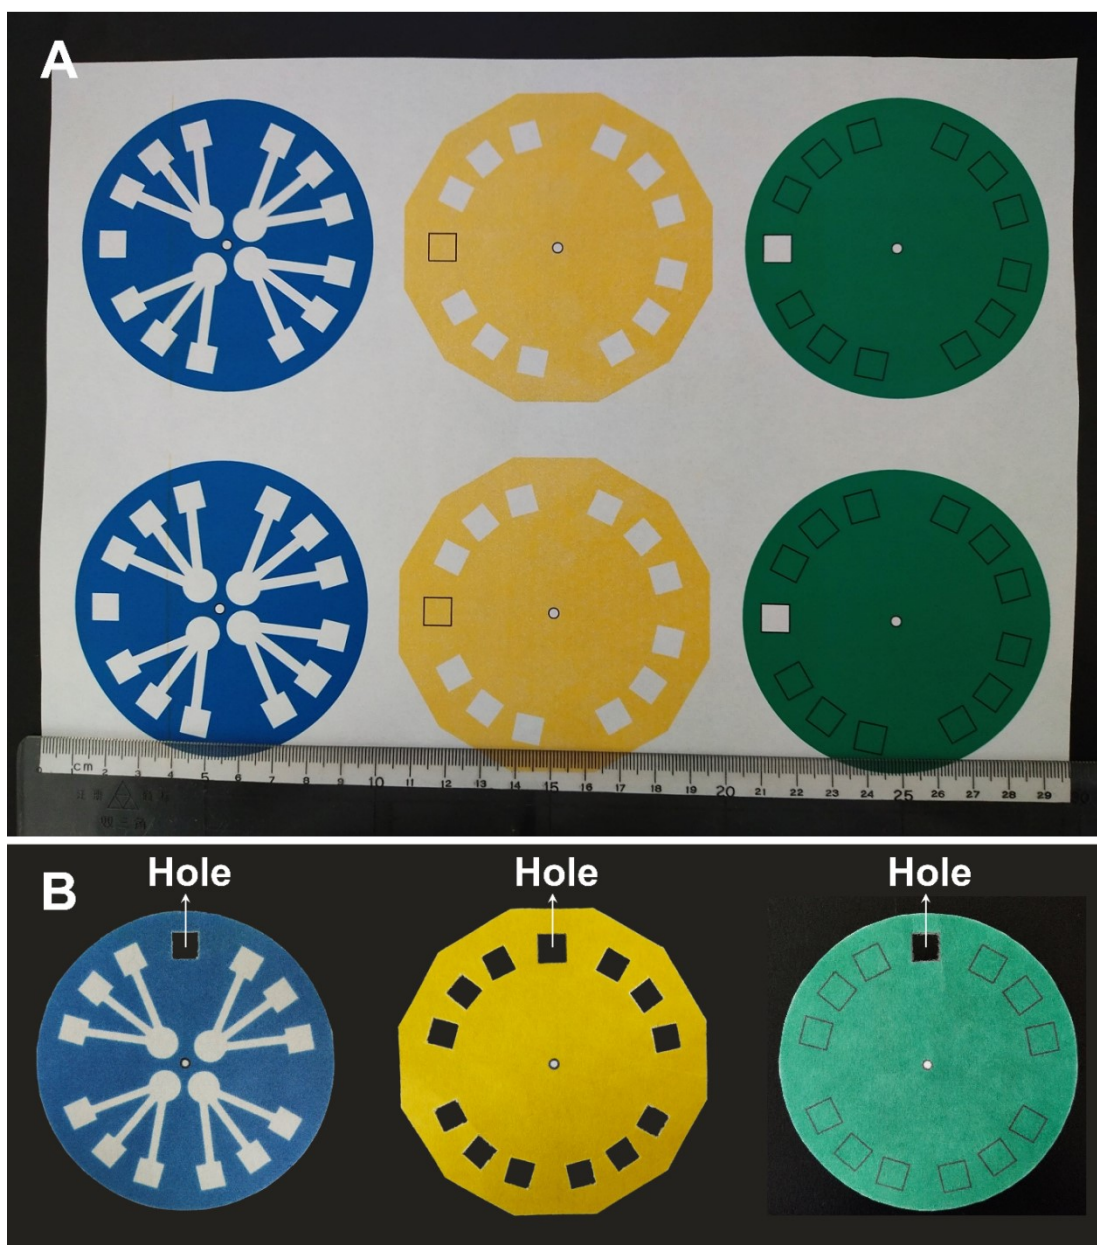

**Fig. S1.** Photographs of (A) the rotational microfluidic hybrid chip printed on Whatman chromatography No. 1 filter paper of A4 size, (B) three layers without/with designed holes in them.

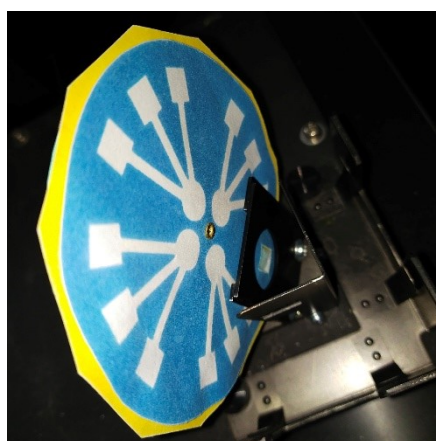

**Fig. S2.** Photograph of the rotational microfluidic hybrid chip placed on the shelf of F-4700 spectrophotometer.

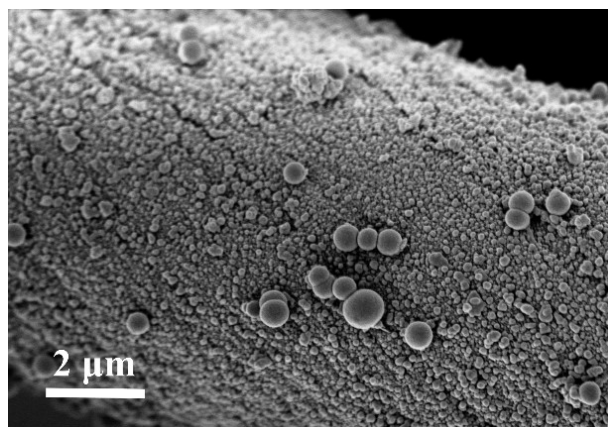

**Fig. S3.** SEM images of the NIP cloth-based fluorescence sensing component.

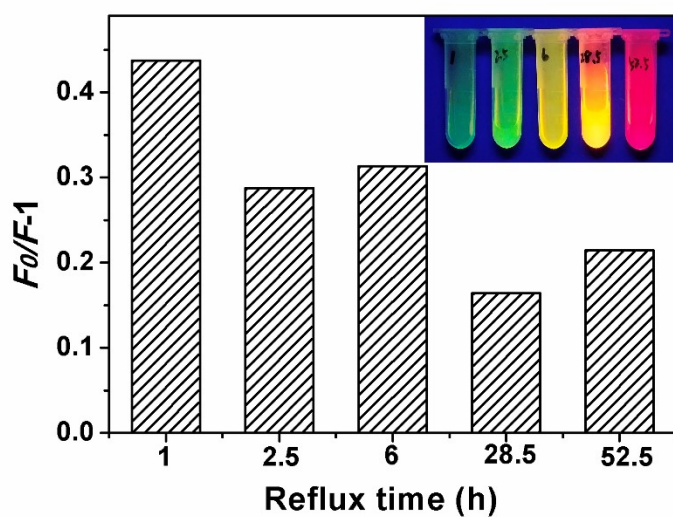

**Fig. S4.** Fluorescence quenching of TGA-capped CdTe QDs with different reflux time.

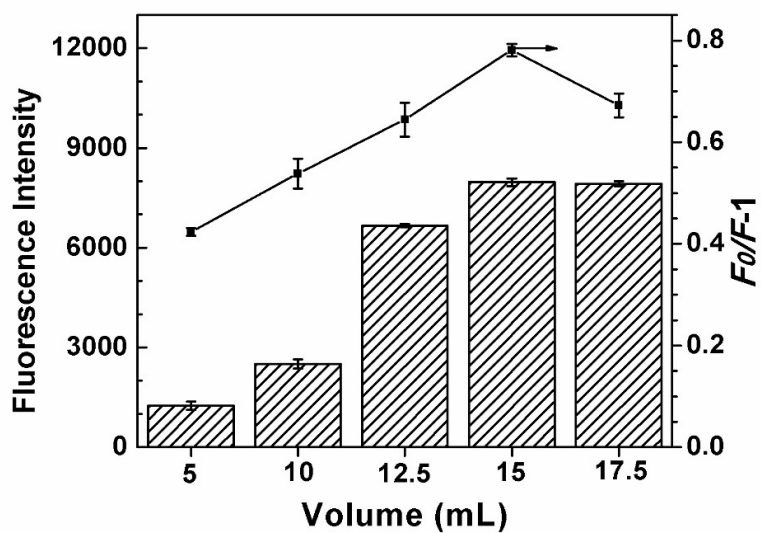

**Fig. S5.** Effects of the amount of CdTe quantum dots on fluorescence intensity and quenching of cloth-based sensing components.

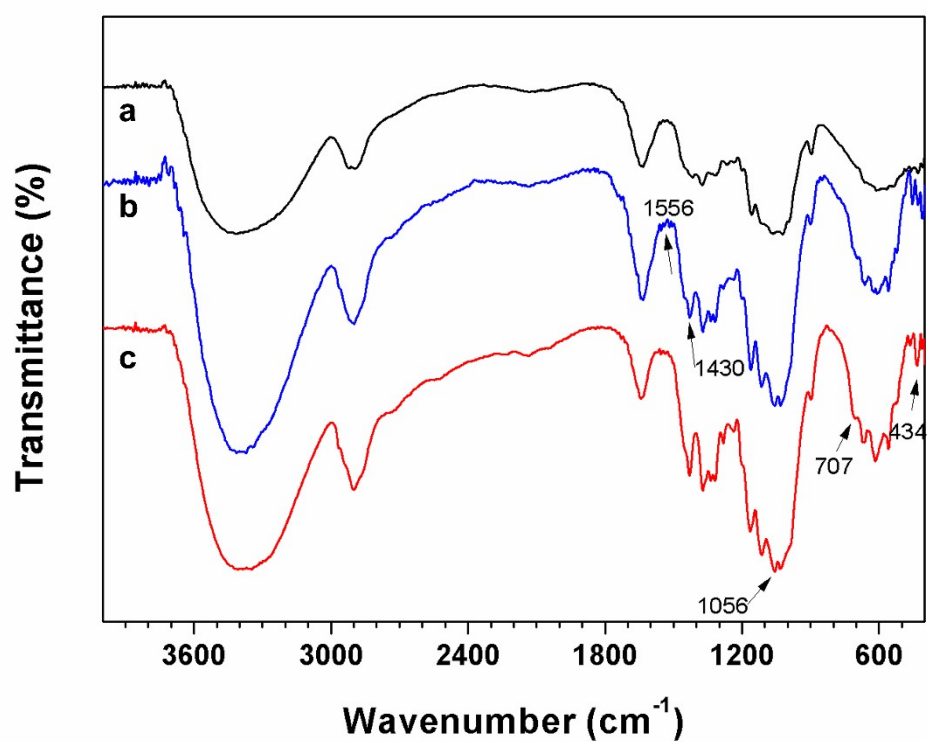

**Fig. S6.** FT-IR spectra of (a) bare cloth, (b) cloth grafted with CdTe quantum dots and (c) IIP cloth-based fluorescence sensing component.

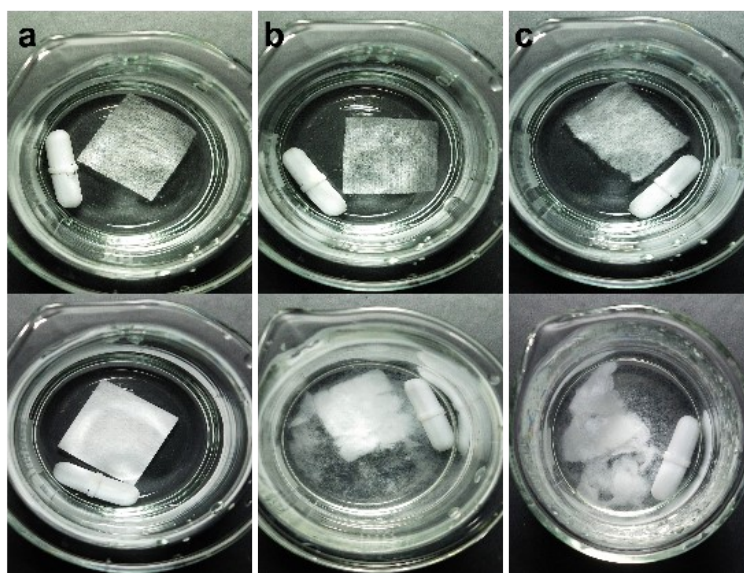

**Fig. S7** Photographs of cloth (up) and paper (down) after vigorous magnetic stirred of (a) 0 min, (b) 10 min and (c) 20 min.

**Table.S1.** The performance of Cr-IIP fluorescence sensing cloth-based components under different concentration of template ions and addition amount of functional monomer and crosslinker.

| Type<br>Group | Template<br>(mg/L) | Momomer<br>APTES( $\mu$ L) | Crosslinker<br>TEOS( $\mu$ L) | Initial FL<br>$F_0$ | Quench FL<br>$F$ | $F_0/F-1$ |
|---------------|--------------------|----------------------------|-------------------------------|---------------------|------------------|-----------|
| 1             | 100                | 60                         | 50                            | 2560                | 2101             | 0.2185    |
| 2             | 100                | 40                         | 90                            | 3239                | 2694             | 0.2023    |
| 3             | 100                | 40                         | 50                            | 1804                | 1455             | 0.2399    |
| 4             | 80                 | 60                         | 50                            | 3462                | 2834             | 0.2216    |
| 5             | 80                 | 40                         | 50                            | 2698                | 2110             | 0.2787    |
| 6             | 70                 | 60                         | 50                            | 2433                | 1729             | 0.4072    |
| 7             | 70                 | 40                         | 50                            | 2825                | 2335             | 0.2099    |
| 8             | 60                 | 60                         | 50                            | 2663                | 2045             | 0.3022    |
| 9             | 60                 | 40                         | 50                            | 1991                | 1673             | 0.1901    |
